# Supplementary material for: Disruption of recombination machinery alters the mutational landscape in plant organellar genomes
Source: PubMed Central journal article supplement — bioRxiv. 2024 Jun 3:2024.06.03.597120. Preprint. [Version 1] doi: 10.1101/2024.06.03.597120 (PMC11185577; doi:10.1101/2024.06.03.597120), 2024-06-03
Supplement: NIHPP2024.06.03.597120v1-supplement-1.pdf [file NIHPP2024.06.03.597120v1-supplement-1.pdf]

682 **SUPPLEMENTAL FIGURES**

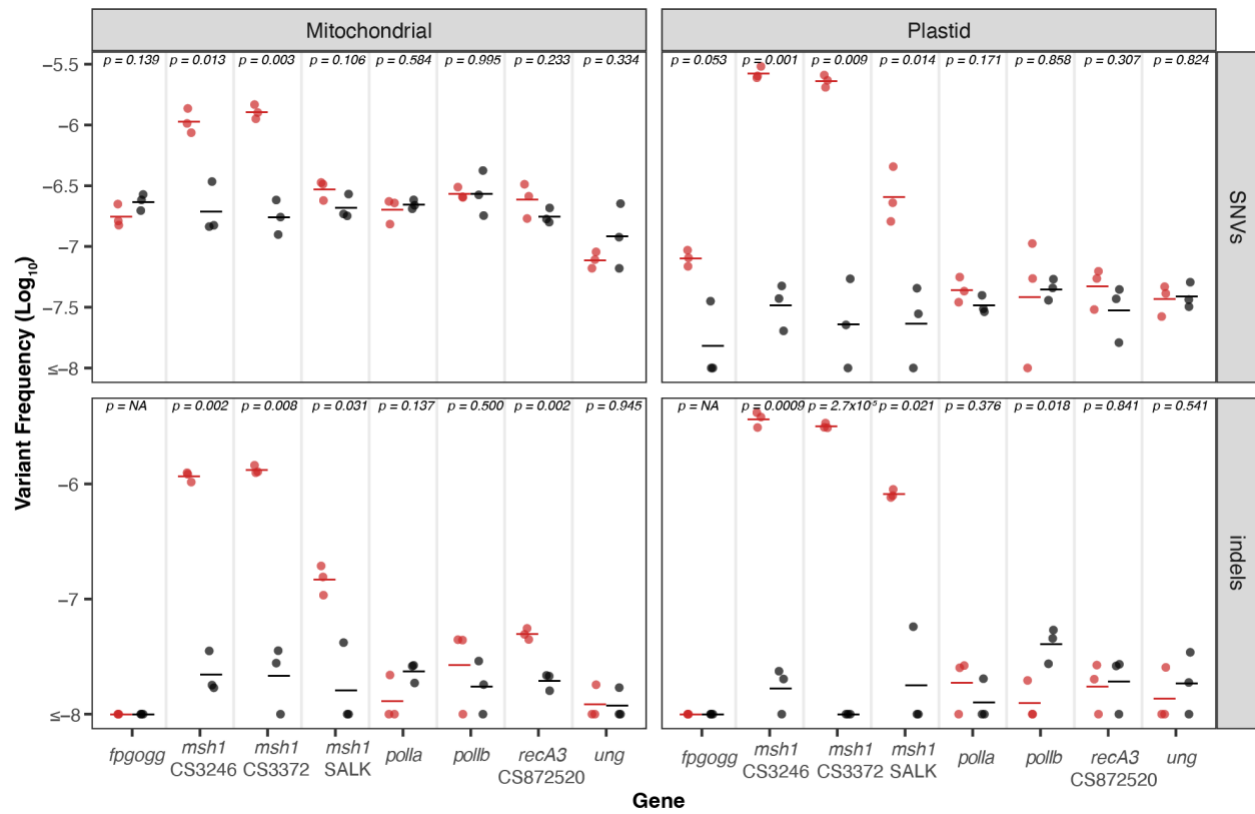

683 Figure S1. *De novo* point mutations measured with Duplex Sequencing from data generated  
 684 in Wu *et al.* 2020. For each gene of interest (x-axis) mutant lines are plotted in red and  
 685 matched WT controls are plotted in black. The individual biological replicates are plotted  
 686 as circles, and group averages are plotted as dashes. Panels separate the data by genome  
 687 (left column: Mitochondria and right column: Plastid) and by point mutation type (top row:  
 688 SNVs and bottom row: indels). The y-axis shows the log-transformed SNV frequencies  
 689 (total SNVs/total DCS coverage). P-values show the result of a two-tailed *t*-test comparing  
 690 WT vs mutant mutation frequencies for each gene of interest. We found significant  
 691 increases in SNV and indel frequencies in the *msh1* CS3246 and *msh1* CS3372 mutants  
 692 (both genomes) but the *msh1* SALK046763 mutant, which is not a complete knockout of  
 693 the *msh1* gene (Wu *et al.*, 2020) had weaker effects. In addition, we note that this *recA3*  
 694 null allele is different from the *recA3* null allele that was reported in the new dataset, but  
 695 both yielded similar results: significant indel and weakly significant SNV increases in  
 696 mtDNA of the *recA3* mutant. Also note the marginally significant difference in *fpg/ogg*

697 plastid SNVs is explained by just 5 SNVs in mutants and a single SNV in the WT controls,  
698 which we do not consider to be a biologically meaningful difference.

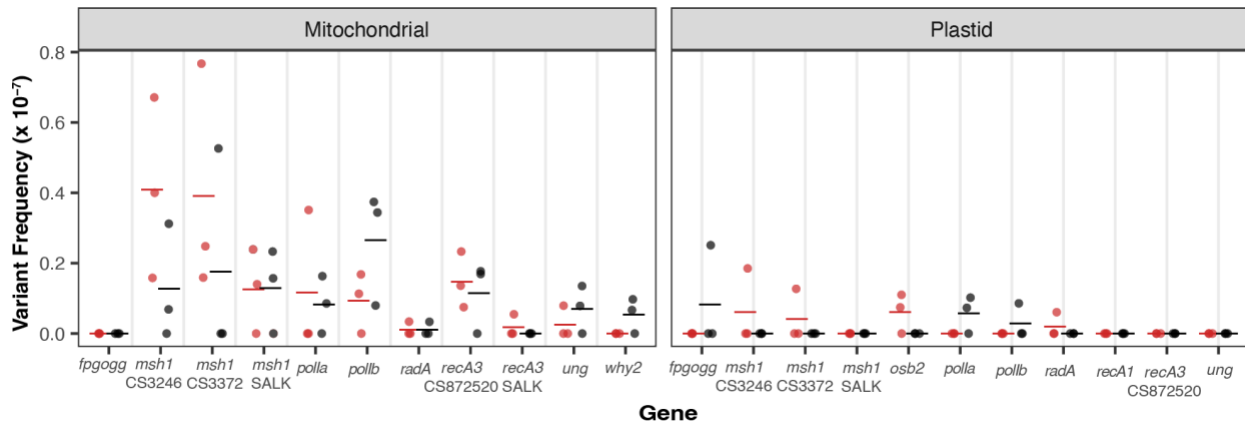

699 Figure S2. Dinucleotide mutations measured with Duplex Sequencing. For each gene of  
700 interest (x axis) mutant lines are plotted in red, and matched WT controls are plotted in  
701 black. The individual biological replicates are plotted as circles, and group averages are  
702 plotted as dashes. Panels divide the data by mitochondrial and plastid. We performed  
703 Wilcoxon rank sum tests to look for differences between mutant and matched WT controls  
704 and all p-values were > 0.05. Note that *recA3* CS872520 dataset was generated in Wu *et al.*  
705 (2020), and the *recA3* SALK 146388 dataset was generated in this study.

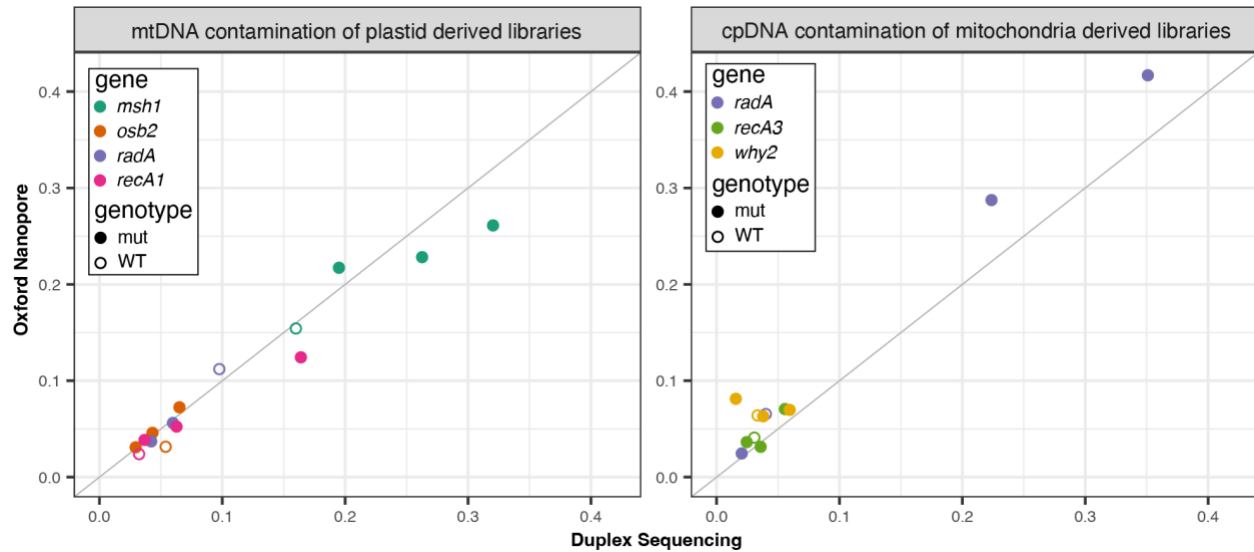

706 Figure S3. Correlation of cross-organelle contamination in Oxford Nanopore and Duplex  
707 Sequencing libraries. Contamination is calculated as the number of contaminating reads in  
708 the read alignments divided by the total number of organellar alignments. The different  
709 mutant lines are colored according to the figure legend with mutant replicates plotted  
710 using closed circles and matched WT controls plotted with open circles. The 1:1 diagonal  
711 line is shown in gray. Though the level of contamination varies between different DNA  
712 samples (for example mtDNA contamination is higher in the plastid derived *msh1* libraries)  
713 the contamination levels are generally similar irrespective of sequencing technique. Note,  
714 For the *msh1* mtDNA analysis, we relied exclusively the plastid-derived *msh1* samples,  
715 and for the *radA* mtDNA analysis, we used a combination of the low coverage *radA*  
716 mitochondrial samples and the plastid *radA* samples (see main text).

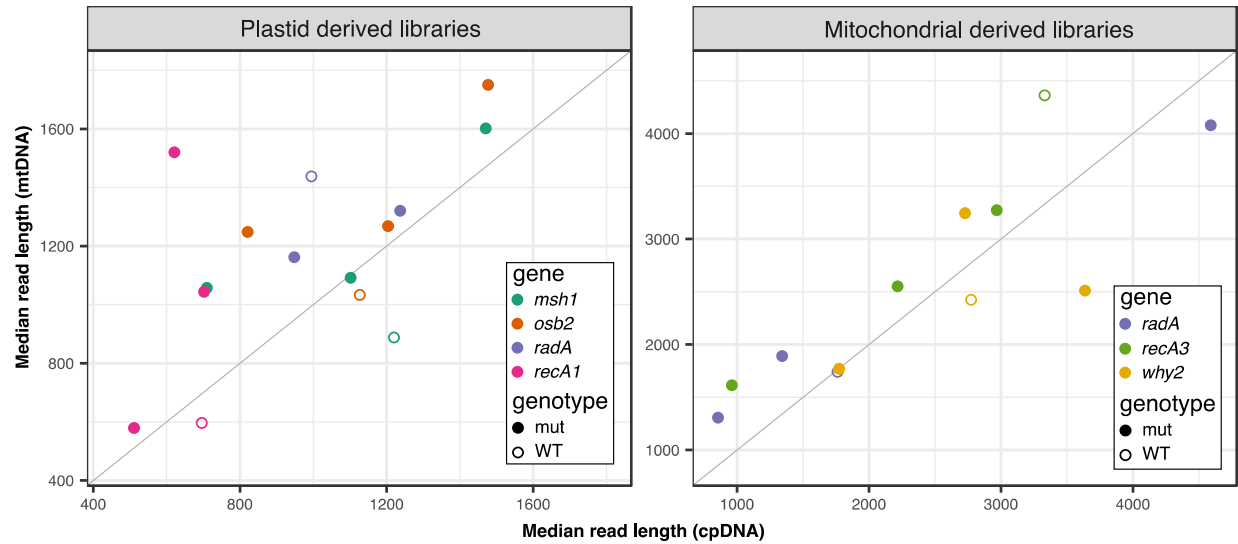

717 Figure S4. Median read length cross-organelle contaminating and native reads in the  
718 plastid and mitochondrial derived nanopore libraries. The different mutant lines are  
719 colored according to the figure legend with mutant replicates plotted using closed circles  
720 and matched WT controls plotted with open circles. The 1:1 diagonal line is show in gray.  
721 Note, For the *msh1* mtDNA analysis, we relied exclusively the plastid-derived *msh1*  
722 samples, and for the *radA* mtDNA analysis, we used a combination of the low coverage  
723 *radA* mitochondrial samples and the plastid *radA* samples (see main text).

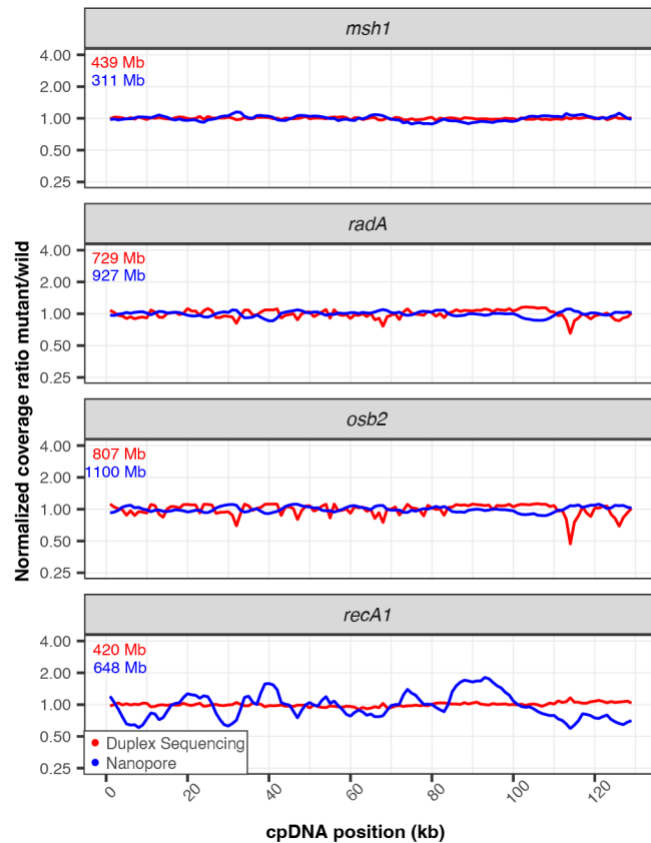

724 Figure S5. Normalized coverage of plastid genomes in mutant lines of interest . Coverage of  
725 each Duplex Sequencing (red) or nanopore (blue) library was calculated in 1000-bp  
726 windows. Mutant coverage was pooled and divided by WT coverage and the resulting ratios  
727 were normalized to 1 for plotting. The total amount of sequencing data used to generate  
728 each plot is shown in the top left corner of each panel (red=Duplex Sequencing and  
729 blue=nanopore) and is included to highlight the instances where disagreement between  
730 the Duplex Sequencing and nanopore lines may be explained by increased variance in the  
731 nanopore sample due to lower mtDNA coverage. To see the coverage of the individual  
732 replicates see Fig S8 and S9.

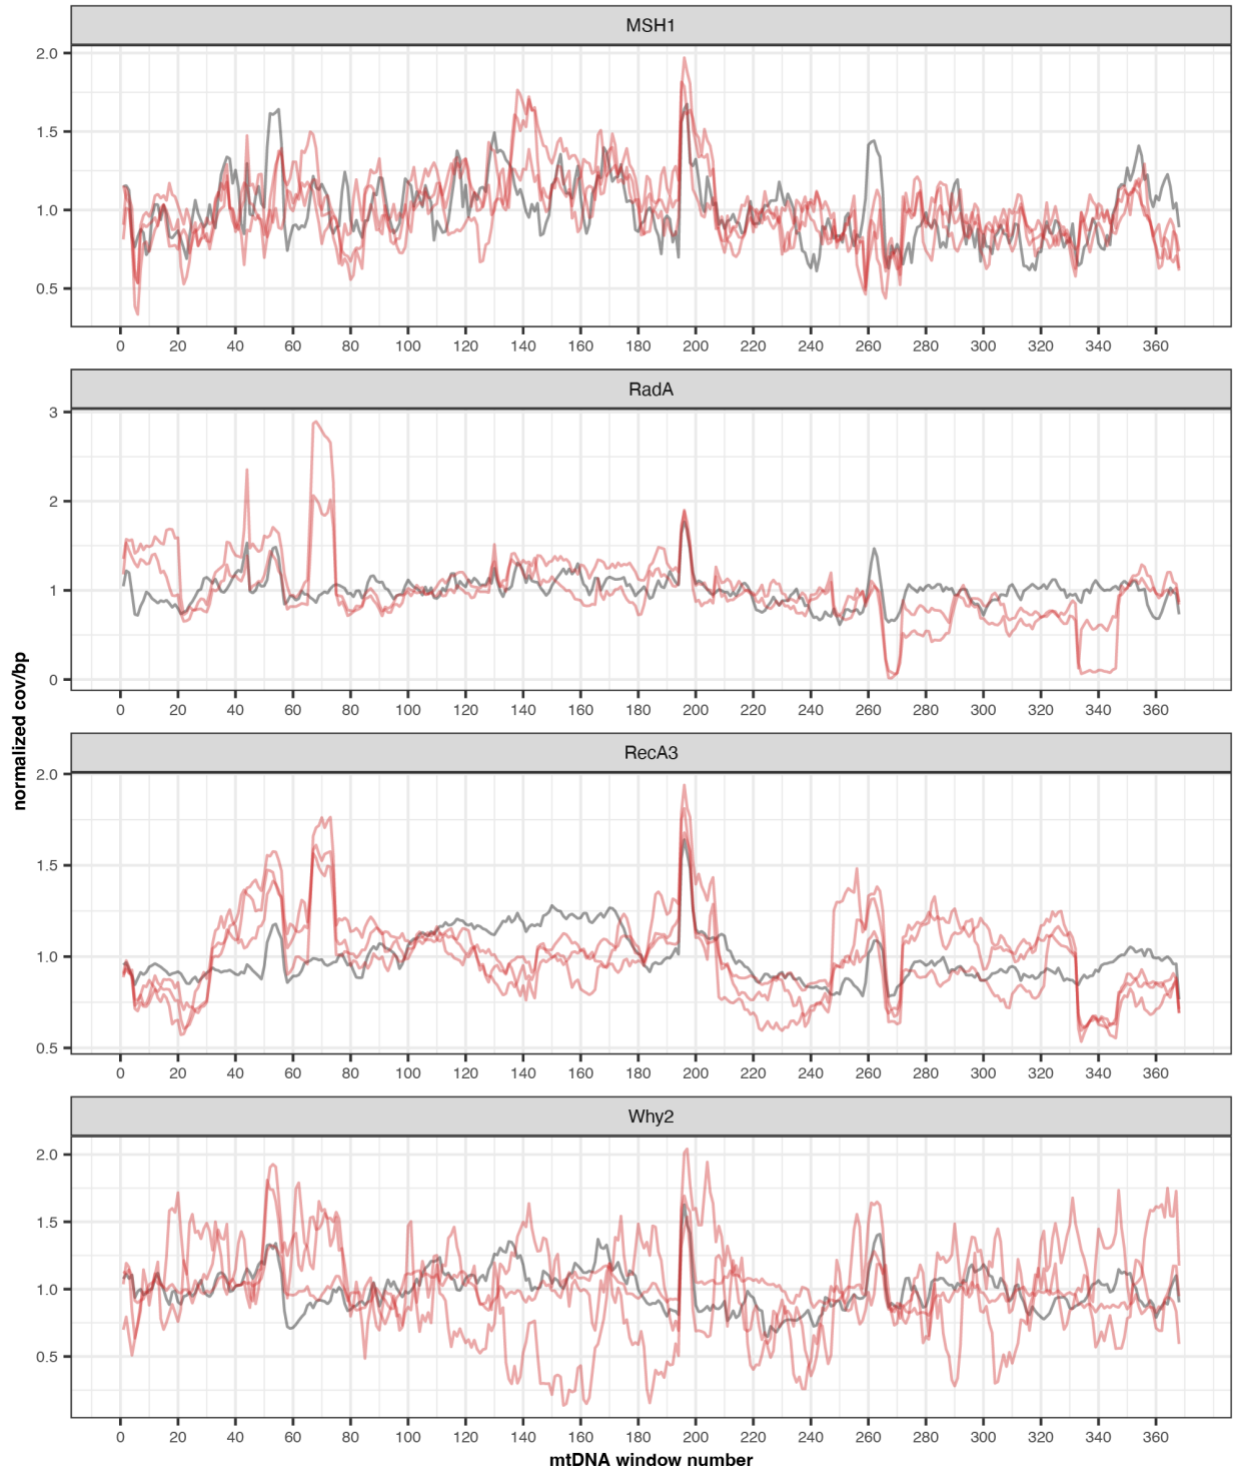

733 Figure S6. Normalized coverage of the individual nanopore mtDNA replicates (used to  
734 generate Fig. 8). The red and black lines show the normalized coverage of the mutant  
735 replicates and the matched WT control, respectively. Note that variation in the *why2*

736 mutants is likely due to extremely low coverage in these samples (average coverage per bp  
737 of 157.3, 6.5 and 7.0 in mutant replicates 1, 2 and 3, respectively).



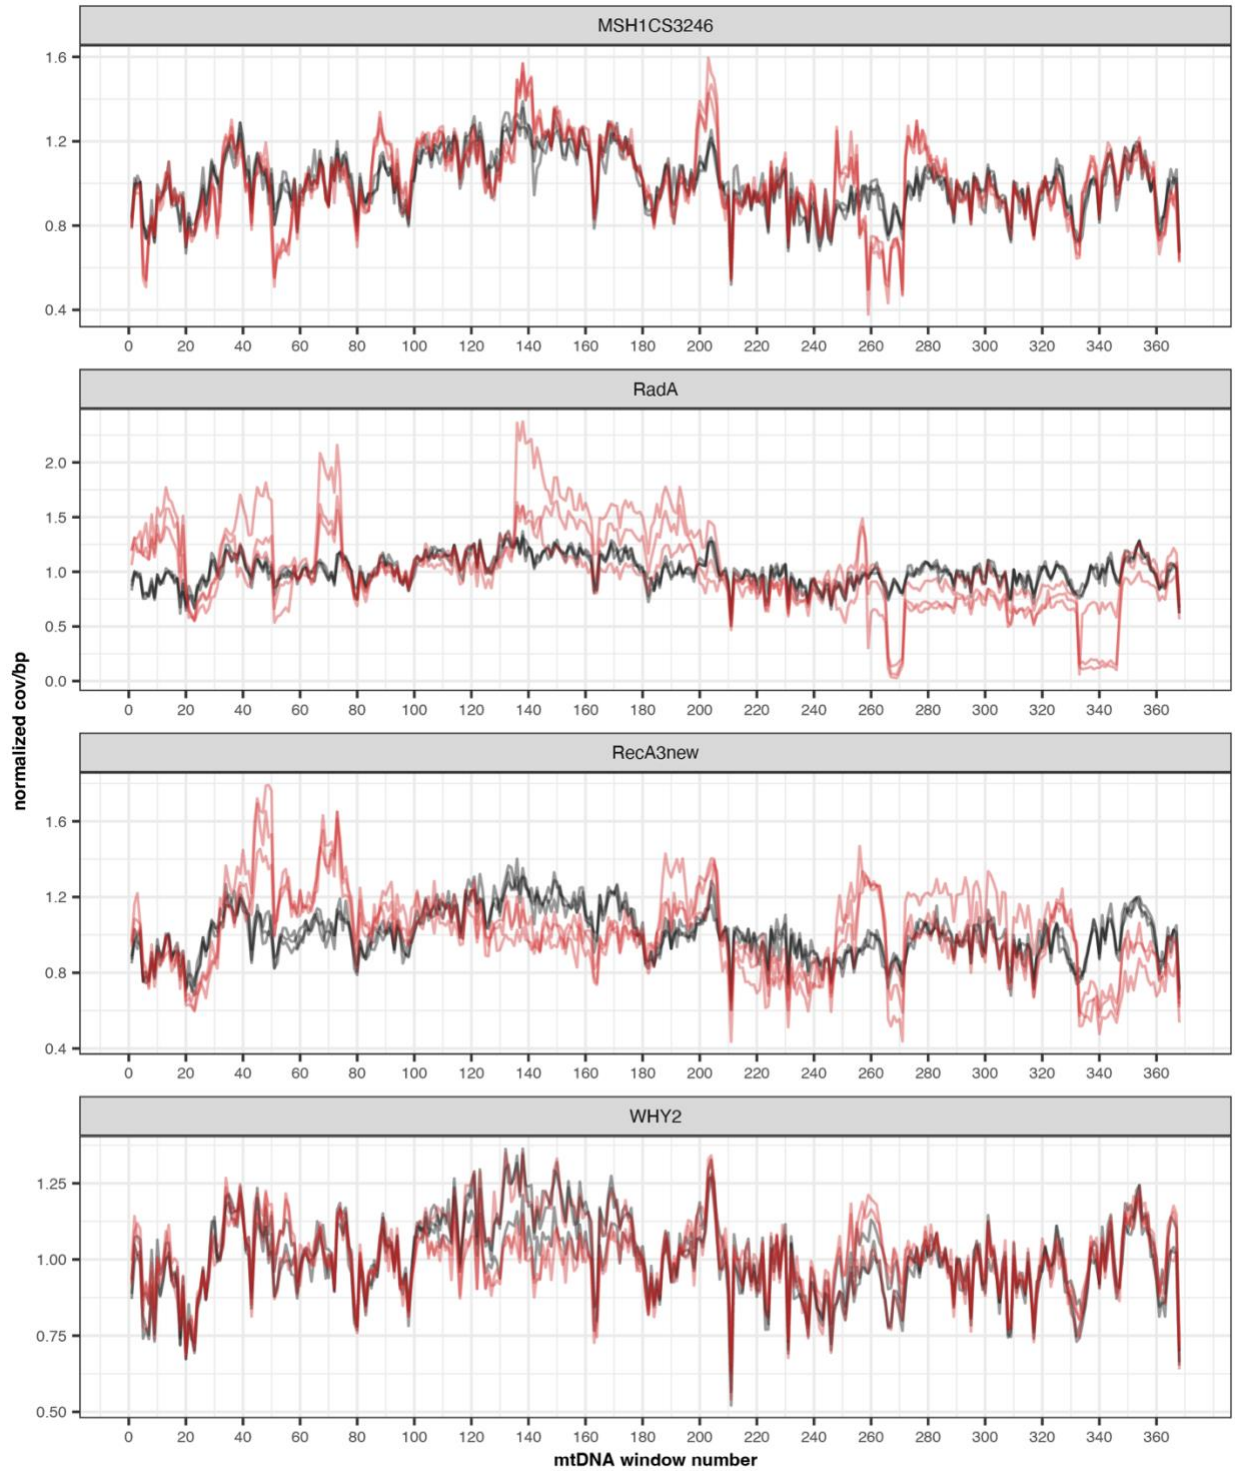

738 Figure S7. Depth of coverage of the individual Duplex Sequencing mtDNA replicates (used  
739 to generate Fig. 8). The red and black lines show the normalized coverage of the mutant  
740 replicates and the matched WT control, respectively.

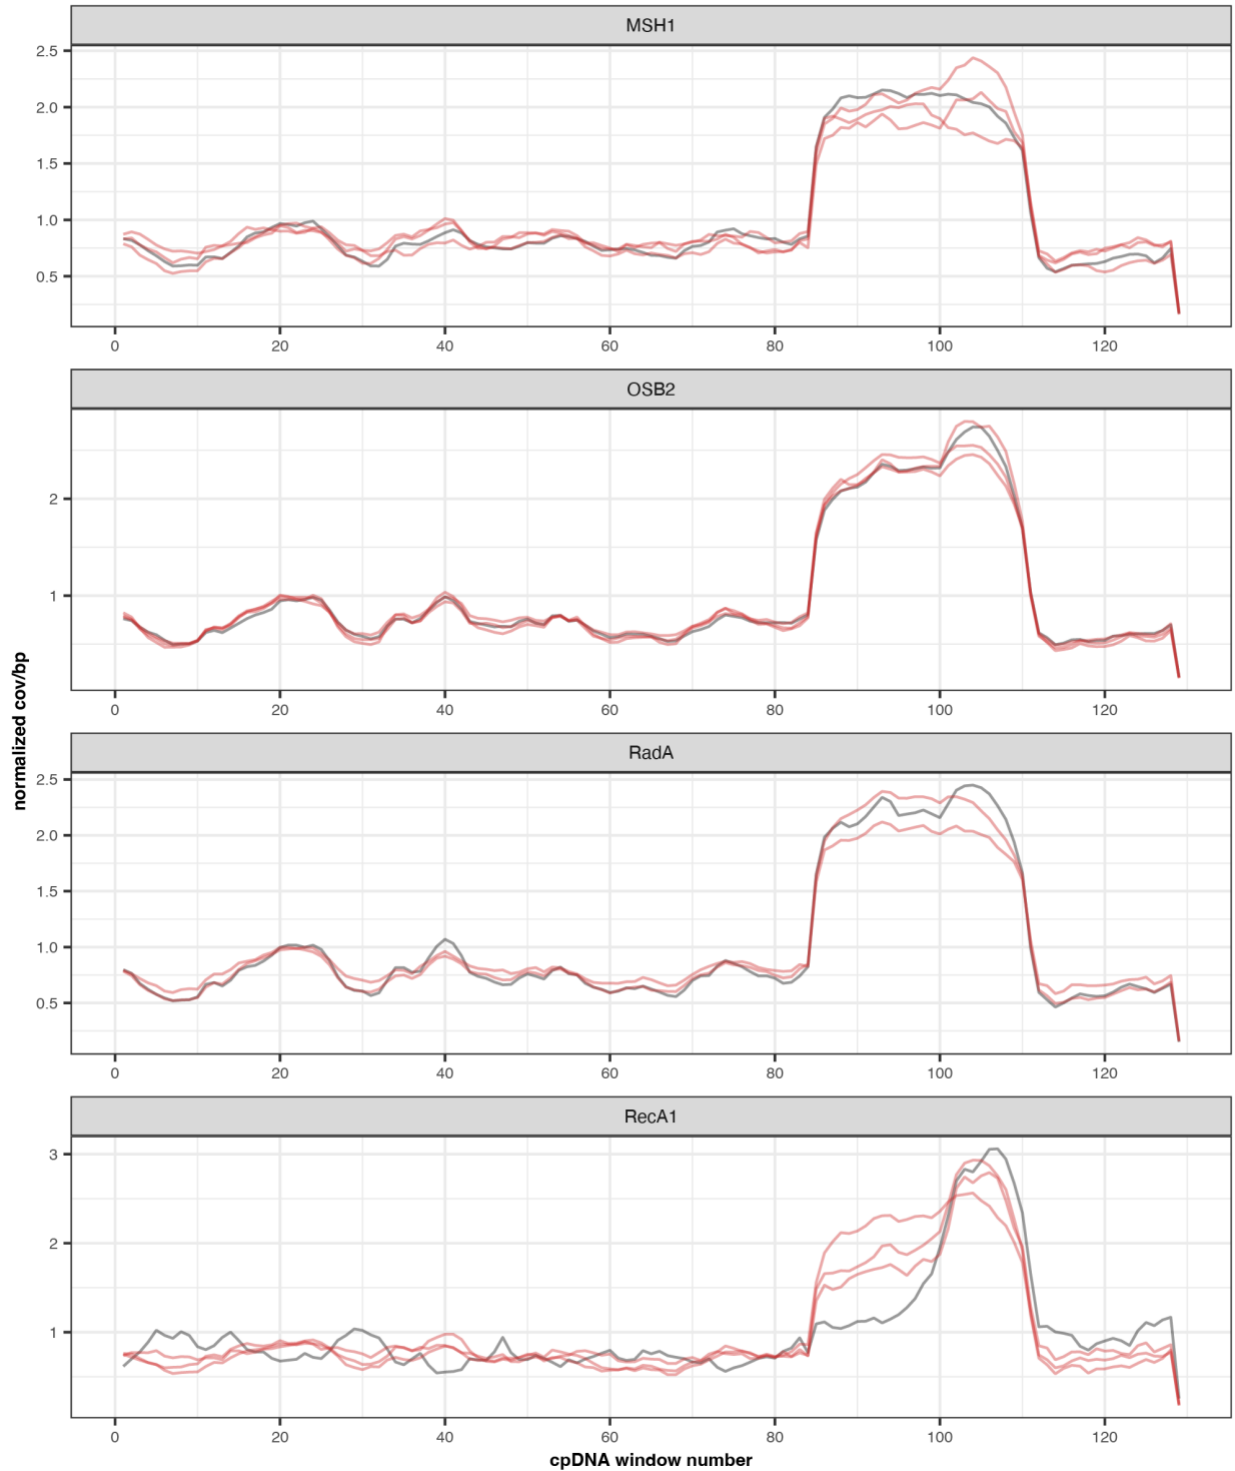

741 Figure S8. Normalized of coverage of the individual nanopore cpDNA replicates (used to  
742 generate Fig. 8). The red and black lines show the normalized coverage of the mutant  
743 replicates and the matched WT control, respectively. Note that the spike in coverage at  
744 ~84-112 kb results from the large inverted repeat, since these reads were mapped

745 noncompetitively with minimap2 (see methods). The second copy of the inverted repeat  
746 was omitted for plotting.

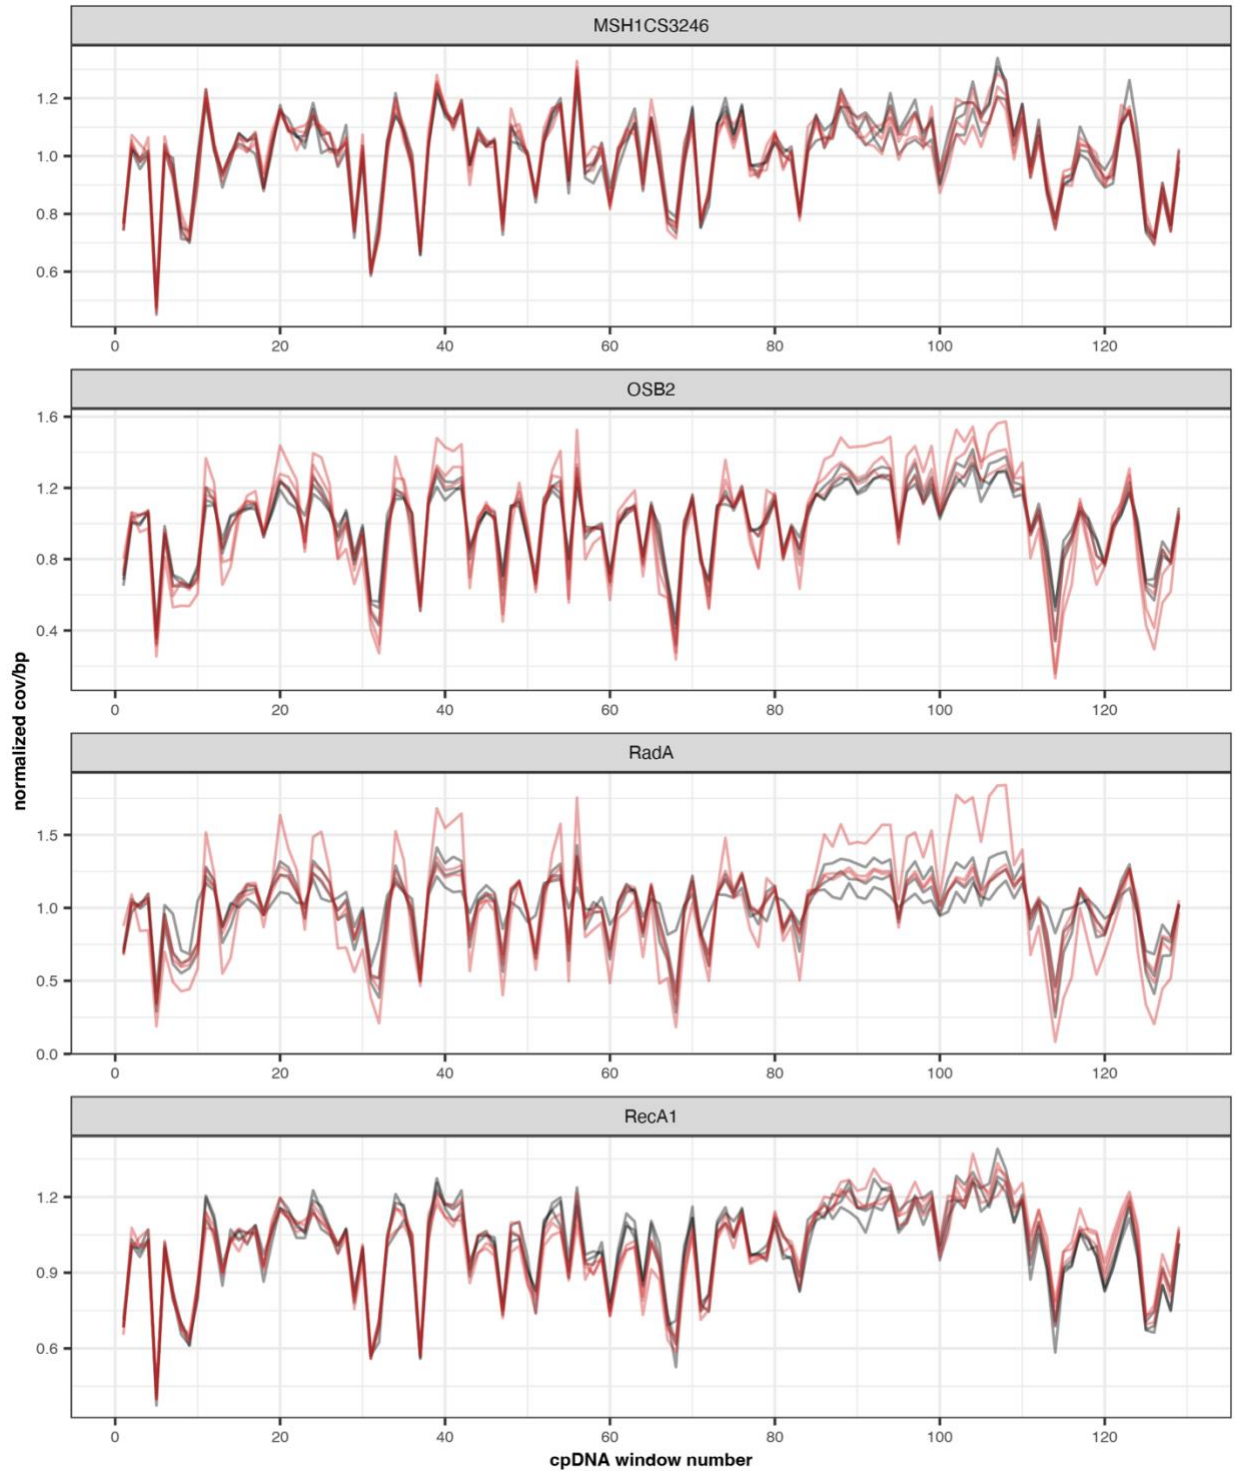

747 Figure S9. Normalized coverage of the individual Duplex Sequencing cpDNA replicates  
748 (used to generate Fig. 8). The red and black lines show the normalized coverage of the  
749 mutant replicates and the matched WT control, respectively. Note these reads were

750 mapped to a full length cpDNA but the second large inverted repeat was omitted for  
751 plotting.

752 **SUPPLEMENTAL TABLES**

753

754 **Table S1.** Mutant lines used in this study and primers to verify plant genotype

| <b>Gene</b>  | <b>Salk line (all from ABRC)</b> | <b>Locus</b> | <b>Forward Primer Wild</b>  | <b>Forward Primer Mutant (LBb1.3)</b> | <b>Reverse Primer Wild and Mutant</b> |
|--------------|----------------------------------|--------------|-----------------------------|---------------------------------------|---------------------------------------|
| <i>radA</i>  | SALK_097880                      | AT5G50340    | TTTCACTTATCGAG<br>CCAGAGC   | ATTTTGCCGATTC<br>GGAAC                | ATGCCATAATGCTT<br>TTTGCTG             |
| <i>recA1</i> | SALK_072979                      | AT1G79050    | TAGGGTGAGATTG<br>GAATGCAG   | ATTTTGCCGATTC<br>GGAAC                | AAGAGCTGCTGCT<br>CATCAAAG             |
| <i>recA3</i> | SALK_146388                      | AT3G10140    | CGTTTGGTCAGTT<br>GAAGCTTC   | ATTTTGCCGATTC<br>GGAAC                | CTCCACAAGTCAC<br>TTCTTCGG             |
| <i>osb2</i>  | SALK_061852                      | AT4G20010    | AGCGTGAAAGGT<br>GAGACGTT    | ATTTTGCCGATTC<br>GGAAC                | GGGAAATAACAGT<br>ACCAGCCC             |
| <i>why2</i>  | SALK_118900                      | AT1G71260    | CAGGAAGTCACT<br>GTCAGTTAAGC | ATTTTGCCGATTC<br>GGAAC                | ACCCATGATTTAGA<br>AGTCTTAGAGAGG       |

755 **Table S2.** Duplex read-pairs and organellar genome coverage

| <b>Sample</b>              | <b>Count of read-pairs (2x150)</b> | <b>Organellar coverage per bp</b> |
|----------------------------|------------------------------------|-----------------------------------|
| mitochondrial_rada_mut_1   | 75863350                           | 297.9                             |
| mitochondrial_rada_mut_2   | 64771627                           | 281.8                             |
| mitochondrial_rada_mut_3   | 139195192                          | 803.4                             |
| mitochondrial_rada_wild_1  | 70847671                           | 127.8                             |
| mitochondrial_rada_wild_2  | 61998713                           | 246.9                             |
| mitochondrial_rada_wild_3  | 127161861                          | 816.4                             |
| mitochondrial_reca3_mut_1  | 43472074                           | 94.2                              |
| mitochondrial_reca3_mut_2  | 44312097                           | 229.3                             |
| mitochondrial_reca3_mut_3  | 59128403                           | 497.3                             |
| mitochondrial_reca3_wild_1 | 62354817                           | 238.2                             |
| mitochondrial_reca3_wild_2 | 54311915                           | 183.2                             |
| mitochondrial_reca3_wild_3 | 40734051                           | 144.8                             |
| mitochondrial_why2_mut_1   | 63375069                           | 338.0                             |
| mitochondrial_why2_mut_2   | 76906783                           | 284.9                             |
| mitochondrial_why2_mut_3   | 76221972                           | 292.6                             |
| mitochondrial_why2_wild_1  | 68231709                           | 279.8                             |
| mitochondrial_why2_wild_2  | 81396138                           | 379.9                             |
| mitochondrial_why2_wild_3  | 86880259                           | 408.4                             |
| plastid_osb2_mut_1         | 47505179                           | 1176.6                            |
| plastid_osb2_mut_2         | 54307516                           | 870.8                             |
| plastid_osb2_mut_3         | 59415250                           | 898.6                             |
| plastid_osb2_wild_1        | 59542949                           | 1132.8                            |
| plastid_osb2_wild_2        | 69408084                           | 889.7                             |
| plastid_osb2_wild_3        | 67727784                           | 668.6                             |
| plastid_rada_mut_1         | 76116128                           | 1174.4                            |
| plastid_rada_mut_2         | 68615282                           | 871.7                             |

|                      |          |        |
|----------------------|----------|--------|
| plastid_rada_mut_3   | 45985626 | 1068.7 |
| plastid_rada_wild_1  | 53480887 | 234.2  |
| plastid_rada_wild_2  | 46684396 | 954.5  |
| plastid_rada_wild_3  | 46190084 | 776.4  |
| plastid_reca1_mut_1  | 66804365 | 543.7  |
| plastid_reca1_mut_2  | 38396319 | 594.8  |
| plastid_reca1_mut_3  | 30645358 | 299.3  |
| plastid_reca1_wild_1 | 37377457 | 598.2  |
| plastid_reca1_wild_2 | 32420159 | 543.5  |
| plastid_reca1_wild_3 | 33351491 | 331.1  |



756 **Table S3.** Results from Kruskal-Wallis test comparing SNV frequencies among genomic  
757 regions in WT and *msh1* mutant data from Wu *et al.*, (2020)

| <b>Sample</b>            | <b>Kruskal-Wallis chi-squared value</b> | <b>p-value</b> |
|--------------------------|-----------------------------------------|----------------|
| <i>msh1</i> mitochondria | 6.03                                    | 0.19           |
| <i>msh1</i> plastid      | 5.47                                    | 0.24           |
| WT mitochondria          | 6.66                                    | 0.15           |
| WT plastid               | 11.35                                   | 0.02           |

758 **Table S4.** Oxford Nanopore sequencing yields for each of the three runs

| <b>Sample</b>              | <b>Sequencing run</b> | <b>Read count</b> | <b>Long reads count (&gt;500bp)</b> | <b>Total yield (Mb)</b> |
|----------------------------|-----------------------|-------------------|-------------------------------------|-------------------------|
| plastid_recA1_wild_1       | 1                     | 224238            | 131719                              | 412.21                  |
| plastid_recA1_mut_1        | 1                     | 82051             | 39041                               | 121.45                  |
| plastid_recA1_mut_2        | 1                     | 74341             | 32851                               | 130.77                  |
| plastid_recA1_mut_3        | 1                     | 72833             | 41137                               | 167.30                  |
| plastid_radA_wild_1        | 1                     | 127499            | 85335                               | 307.34                  |
| plastid_radA_mut_1         | 1                     | 111390            | 72395                               | 297.02                  |
| plastid_radA_mut_3         | 1                     | 186393            | 119090                              | 540.66                  |
| plastid_osb2_wild_3        | 1                     | 101793            | 66081                               | 239.62                  |
| plastid_osb2_mut_1         | 1                     | 143806            | 92534                               | 407.94                  |
| plastid_osb2_mut_2         | 1                     | 103151            | 74649                               | 349.70                  |
| plastid_osb2_mut_3         | 1                     | 109492            | 63761                               | 260.72                  |
| plastid_msh1_wild_3        | 1                     | 45501             | 29533                               | 126.16                  |
| plastid_msh1_mut_1         | 1                     | 36518             | 24441                               | 111.72                  |
| plastid_msh1_mut_2         | 1                     | 46533             | 26330                               | 97.91                   |
| plastid_msh1_mut_3         | 1                     | 47757             | 32369                               | 153.13                  |
| mitochondrial_recA3_wild_1 | 2                     | 8481              | 6019                                | 56.73                   |
| mitochondrial_recA3_mut_1  | 2                     | 1442              | 813                                 | 8.70                    |
| mitochondrial_recA3_mut_2  | 2                     | 20256             | 14861                               | 101.19                  |
| mitochondrial_recA3_mut_3  | 2                     | 13261             | 8069                                | 52.79                   |
| mitochondrial_radA_wild_3  | 2                     | 2119              | 766                                 | 4.64                    |
| mitochondrial_radA_mut_1   | 2                     | 13790             | 6079                                | 22.39                   |
| mitochondrial_radA_mut_2   | 2                     | 3675              | 154                                 | 0.90                    |
| mitochondrial_radA_mut_3   | 2                     | 1384              | 681                                 | 6.32                    |
| mitochondrial_why2_wild_1  | 2                     | 4720              | 2629                                | 20.01                   |

|                            |   |       |       |        |
|----------------------------|---|-------|-------|--------|
| mitochondrial_why2_mut_1   | 2 | 9965  | 6992  | 50.01  |
| mitochondrial_why2_mut_2   | 2 | 1112  | 411   | 3.34   |
| mitochondrial_why2_mut_3   | 2 | 1279  | 287   | 2.78   |
| mitochondrial_MSH1_wild_1  | 2 | 931   | 95    | 0.52   |
| mitochondrial_MSH1_mut_1   | 2 | 959   | 151   | 0.64   |
| mitochondrial_MSH1_mut_2   | 2 | 925   | 50    | 0.42   |
| mitochondrial_MSH1_mut_3   | 2 | 471   | 34    | 0.22   |
| mitochondrial_recA3_wild_1 | 3 | 16270 | 12616 | 120.48 |
| mitochondrial_recA3_mut_1  | 3 | 1684  | 1028  | 11.65  |
| mitochondrial_recA3_mut_2  | 3 | 13791 | 10705 | 97.58  |
| mitochondrial_recA3_mut_3  | 3 | 13488 | 9944  | 82.53  |
| mitochondrial_radA_wild_3  | 3 | 869   | 650   | 3.98   |
| mitochondrial_radA_mut_1   | 3 | 18460 | 13217 | 53.96  |
| mitochondrial_radA_mut_2   | 3 | 393   | 44    | 0.19   |
| mitochondrial_radA_mut_3   | 3 | 1017  | 500   | 5.02   |
| mitochondrial_why2_wild_1  | 3 | 3596  | 2496  | 18.99  |
| mitochondrial_why2_mut_1   | 3 | 6147  | 3618  | 26.85  |
| mitochondrial_why2_mut_2   | 3 | 1507  | 85    | 0.62   |
| mitochondrial_why2_mut_3   | 3 | 508   | 92    | 0.77   |

Note that, for the *radA* mtDNA analysis, we averaged structural variant frequencies and coverages across the mitochondrially and plastid-derived samples, while for *msh1*, we relied entirely on the plastid-derived samples and did not investigate the mitochondrially derived samples, which had extremely low yield.

759 **Table S5.** Sequencing depth per bp (calculated with bedtools depth) of samples in Fig 8.

| <b>Sample</b> | <b>Sequencing protocol</b> | <b>Mutant (total cov/bp)</b> | <b>WT (total cov/bp)</b> |
|---------------|----------------------------|------------------------------|--------------------------|
| radA_mito     | nanopore                   | 222.9                        | 101.6                    |
| recA3_mito    | nanopore                   | 736.4                        | 372.1                    |
| why2_mito     | nanopore                   | 170.9                        | 82.5                     |
| msh1_mito     | nanopore                   | 161.9                        | 36.9                     |
| radA_mito     | duplex                     | 1600.2                       | 1377.4                   |
| recA3_mito    | duplex                     | 941.4                        | 647.8                    |
| why2_mito     | duplex                     | 1058.7                       | 1235.2                   |
| msh1_mito     | duplex                     | 1020.9                       | 1209.6                   |
| msh1_plastid  | nanopore                   | 1650.1                       | 762.0                    |
| osb2_plastid  | nanopore                   | 6862.2                       | 1663.7                   |
| radA_plastid  | nanopore                   | 5514.3                       | 1668.5                   |
| recA1_plastid | nanopore                   | 2422.6                       | 2603.1                   |
| msh1_plastid  | duplex                     | 1754.4                       | 1645.3                   |
| osb2_plastid  | duplex                     | 3244.9                       | 3009.4                   |
| radA_plastid  | duplex                     | 3444.6                       | 2205.6                   |
| recA1_plastid | duplex                     | 1606.6                       | 1650.2                   |

760

761 **APPENDIX FOR SUPPLEMENTARY FILES**

762

763 **FileS1\_mutation\_counts:** Coverages, mutation counts, and variant frequencies from the  
764 Duplex Sequencing analysis of data generated in this study and in Wu *et al.*, 2020.

765

766 **FileS2\_repeat\_recomb\_freq\_mito:** Counts of recombined reads and total repeat spanning  
767 reads used to calculate repeat specific recombination frequencies. We focused our  
768 mitochondrial analysis on repeats which has at least 10 recombined reads (across all  
769 replicates).

770

771 **FileS3\_repeat\_recomb\_freq\_plastid:** Counts of recombined reads and total repeat  
772 spanning reads used to calculate repeat specific recombination frequencies. We focused  
773 our plastid analysis on repeats which has at least 3 recombined reads (across all  
774 replicates).
